# Supplementary material for: LPPR5 Expression in Glioma Affects Growth, Vascular Architecture, and Sunitinib Resistance
Source: MDPI journal article supplement (doi:10.3390/ijms23063108), 2022-03-13
Supplement: s1 [file s1]

## Survival proportions in GBM

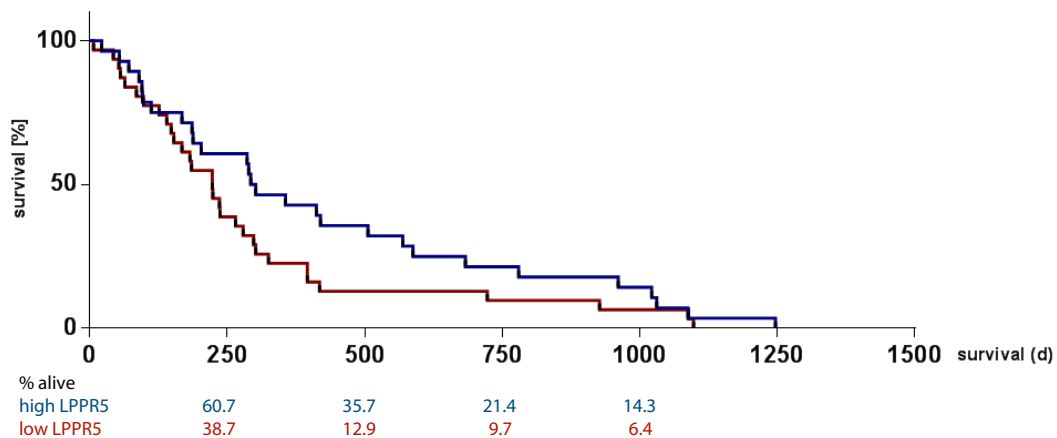

$p > 0,05$

low LPPR5 mean survival 223,0

high LPPR5 mean survival 297,5

Figure S4: Low LPPR5 mRNA expression is insignificantly associated with lower survival in GBM-patients. Kaplan-Meier survival chart using Freije Brain data accessed at Oncomine, separation expression.
