# Supplementary material for: LPPR5 Expression in Glioma Affects Growth, Vascular Architecture, and Sunitinib Resistance
Source: MDPI journal article supplement (doi:10.3390/ijms23063108), 2022-03-13

Supplemental Figure 1

a

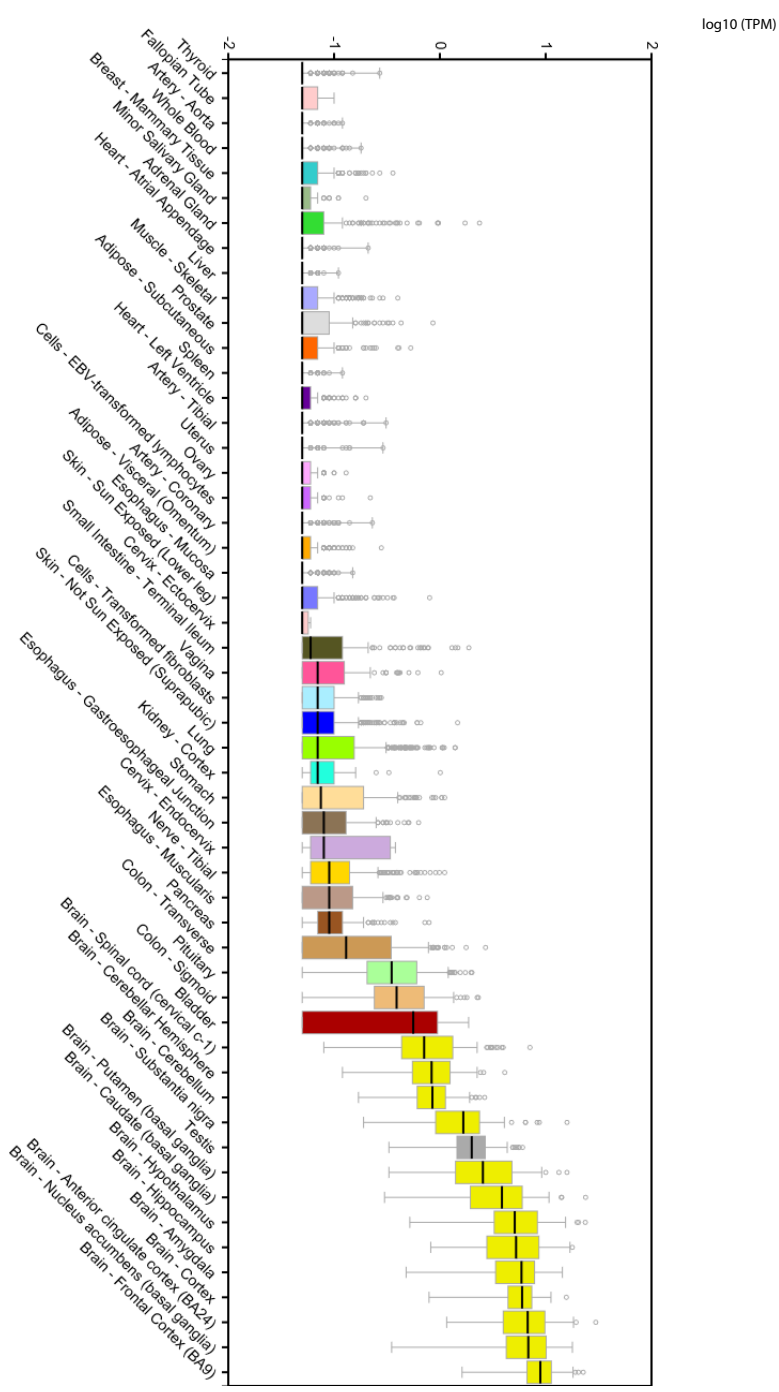

Figure S1 a) expression of LPPR5 in different organs b) LPPR5 expression in the brain compared to neural (green) and proneural (red) classification markers.

b

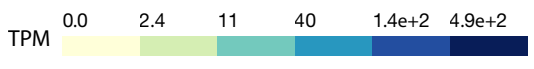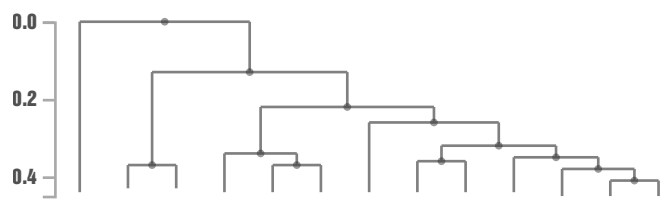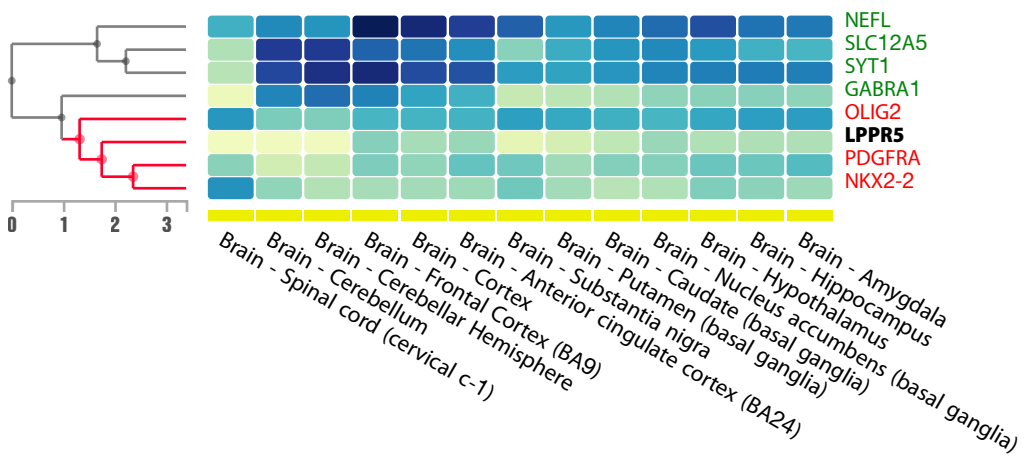

Supplement: s1 [file s1]
