# Supplementary material for: LPPR5 Expression in Glioma Affects Growth, Vascular Architecture, and Sunitinib Resistance
Source: MDPI journal article supplement (doi:10.3390/ijms23063108), 2022-03-13
Supplement: s1 [file s1]

LPPR5

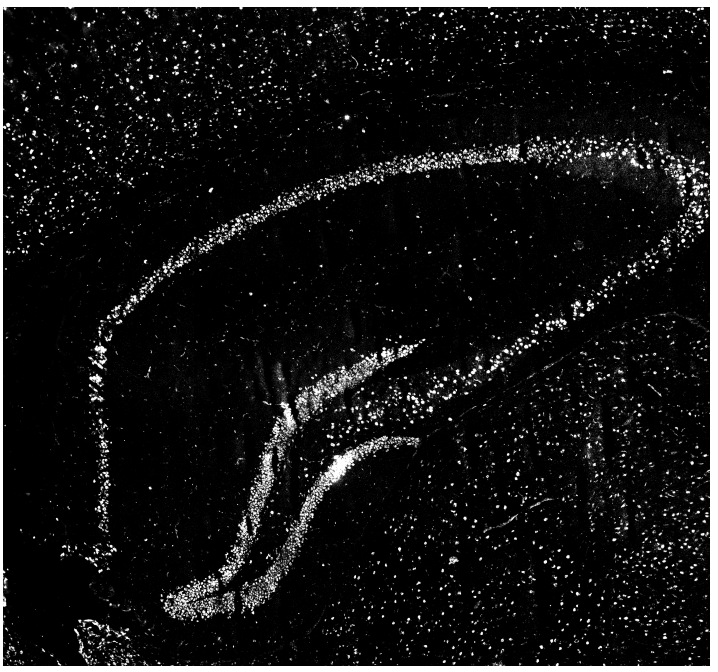

NeuN

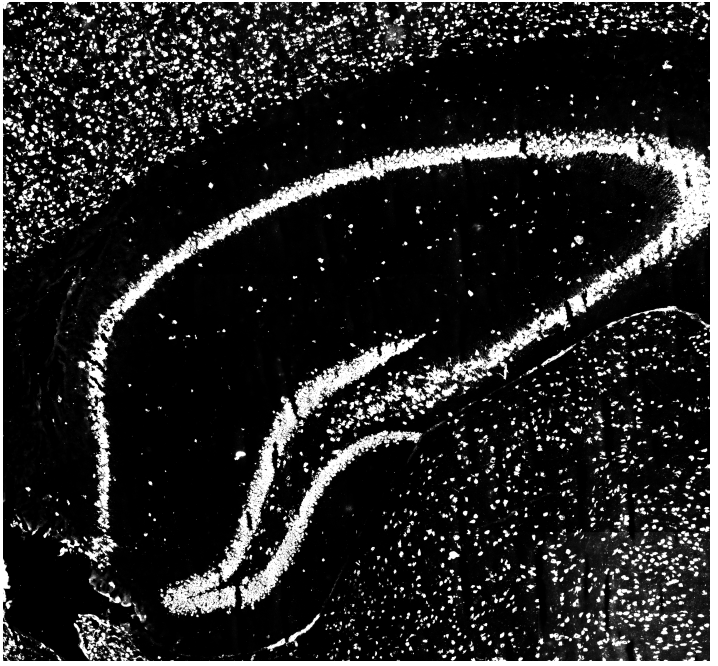

DAPI

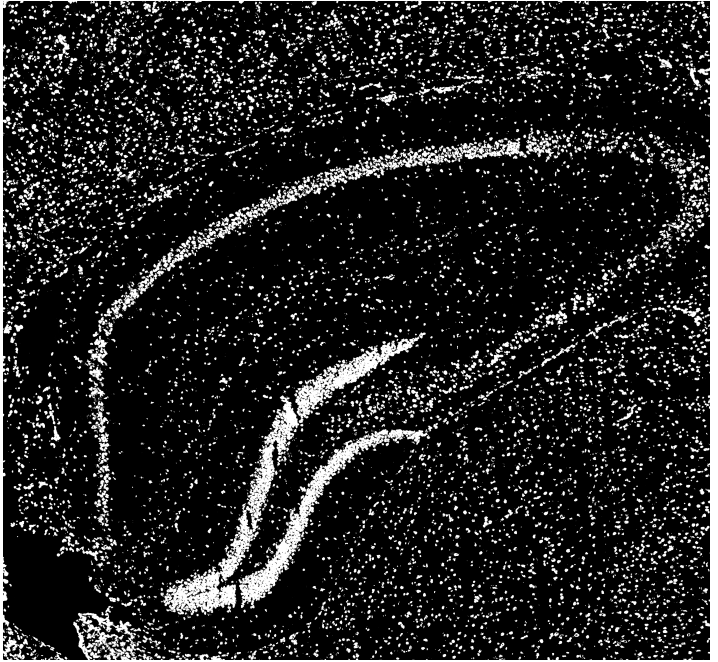

LPPR5/NeuN

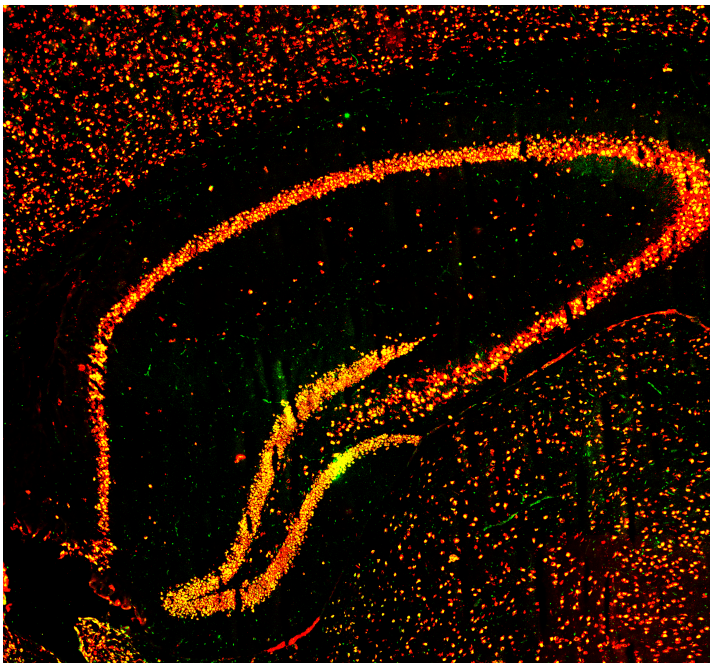

Figure S2: High resolution images of LPPR5 Immuno-histochemical staining in the hippocampus
