# Supplementary material for: LPPR5 Expression in Glioma Affects Growth, Vascular Architecture, and Sunitinib Resistance
Source: MDPI journal article supplement (doi:10.3390/ijms23063108), 2022-03-13
Supplement: s1 [file s1]

Control

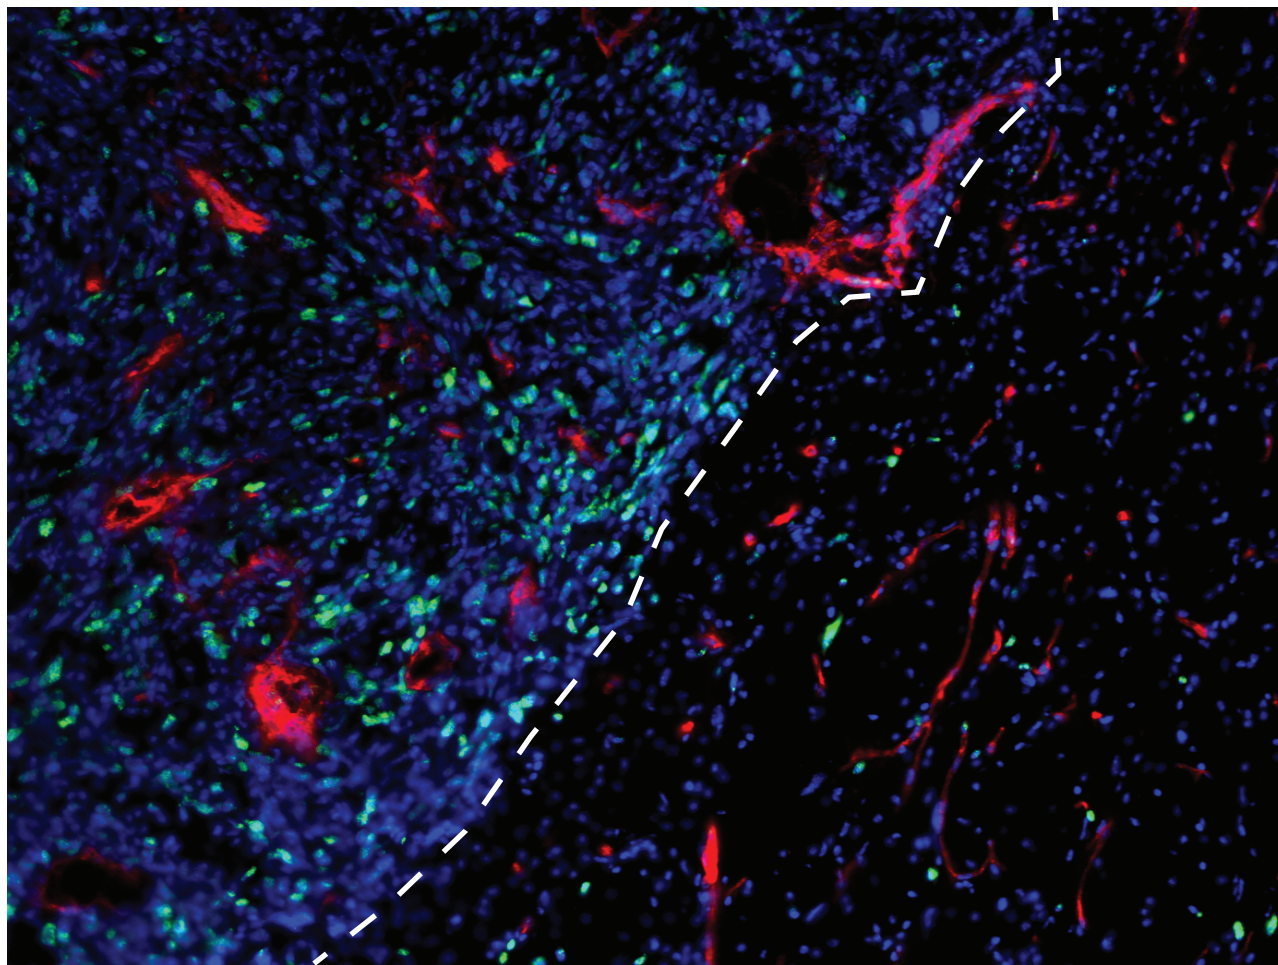

LPPR5

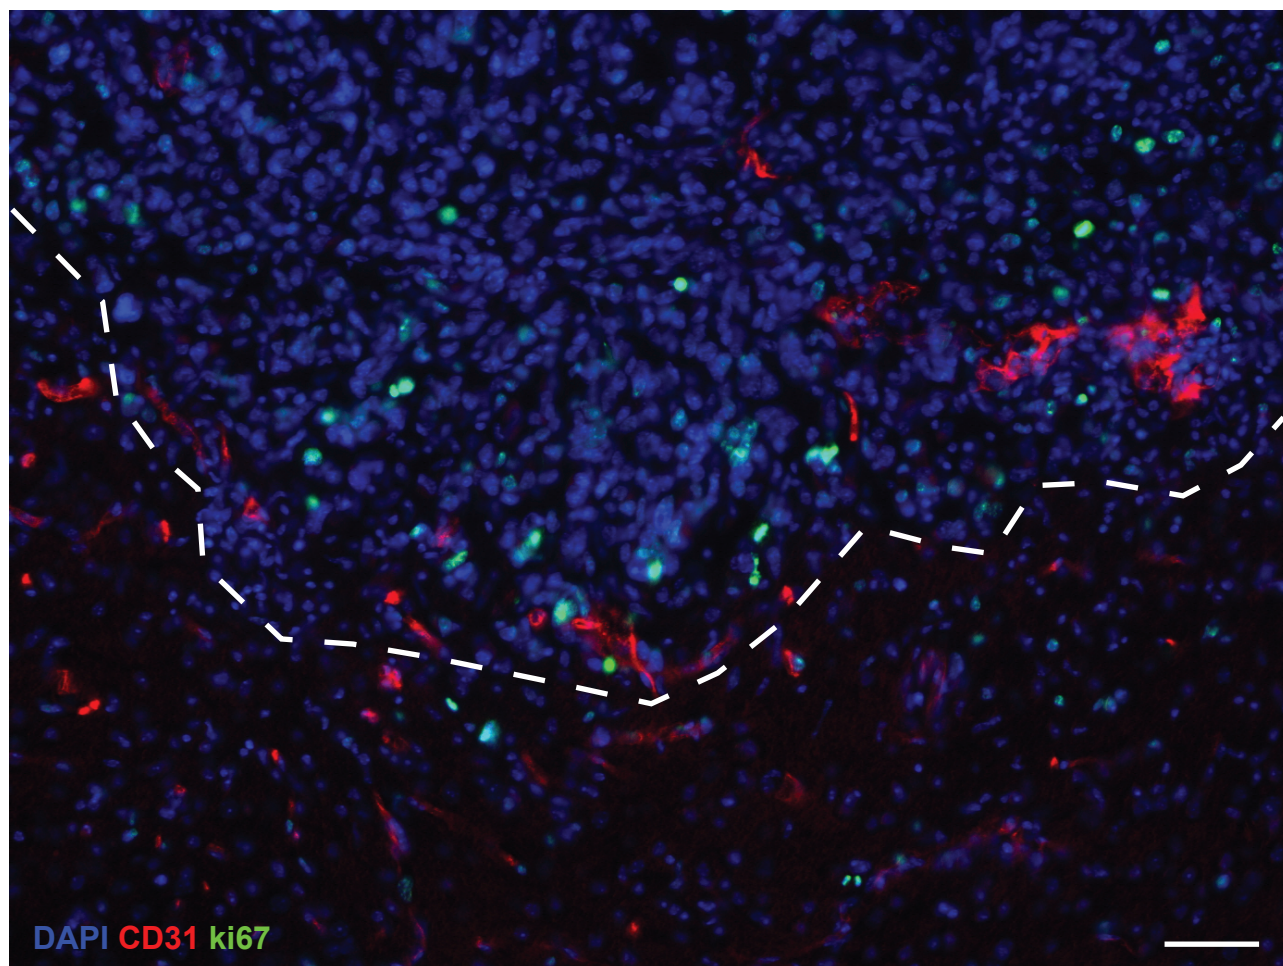

Figure S3: Immunohistochemical staining of LPPR5OE tumor and control tumor boundary zone dashed white line indicates tumor boundary. bar = 50um
